# Supplementary material for: Differential Expression of Plasma Exo-miRNA in Neurodegenerative Diseases by Next-Generation Sequencing
Source: Front Neurosci. 2020 May 7;14:438. doi: 10.3389/fnins.2020.00438 (PMC7227778; doi:10.3389/fnins.2020.00438)
Supplement: TABLE S4 — KEGG results of each cluster. [file Table_4.XLSX]

## Sheet: Sheet1
Supplementary Table S4. KEGG results of each cluster.
Supplementary Table S4a. miRNAs from 4 clusters in top pathway.
ECM-receptor interaction			Fatty acid biosynthesis
AD-down	Genes		AD-up	Genes	PD-down	Genes	PD-up	Genes
hsa-miR-143-3p	7		hsa-miR-424-5p	5	hsa-miR-424-5p	5	hsa-miR-15a-5p	4
hsa-miR-942-5p	11		hsa-miR-23a-3p	1	hsa-miR-485-5p	1	hsa-miR-27a-3p	1
hsa-miR-9-5p|	7		hsa-let-7g-5p	1	hsa-miR-375	2	hsa-let-7e-5p	1
hsa-miR-185-5p	2		hsa-miR-27a-3p	1
hsa-let-7c-5p	9		hsa-miR-27b-3p	1
hsa-let-7b-5p	9		hsa-miR-485-5p	1
hsa-let-7e-5p	10
hsa-miR-92b-3p	8
hsa-miR-19b-3p	7
hsa-miR-183-5p	2
hsa-miR-26b-5p	5
hsa-miR-125a-5p	5
hsa-miR-320d	5
hsa-miR-122-5p	1
hsa-miR-486-5p	3
hsa-miR-204-5p	2
hsa-miR-4685-3p	3

## Sheet: ADupcluster1
Supplementary Table S4b. KEGG results of cluster 1.
KEGG pathway	p-value	#genes	#miRNAs
Fatty acid biosynthesis	2.89827e-12	8	7
Proteoglycans in cancer	1.22734e-06	101	20
Hippo signaling pathway	2.30732e-05	71	19
Signaling pathways regulating pluripotency of stem cells	5.75025e-05	74	20
Glycosphingolipid biosynthesis - lacto and neolacto series	7.53358e-05	13	12
ErbB signaling pathway	7.53358e-05	50	19
Ras signaling pathway	0.000175297	108	19
Glioma	0.000179768	36	18
Lysine degradation	0.000601355	25	15
MAPK signaling pathway	0.00066547	122	21
Adherens junction	0.000781663	42	19
Transcriptional misregulation in cancer	0.000947614	87	19
Wnt signaling pathway	0.000947614	68	20
Focal adhesion	0.00153427	100	20
Renal cell carcinoma	0.001768	39	17
ECM-receptor interaction	0.001768	41	18
Rap1 signaling pathway	0.001768	100	19
TGF-beta signaling pathway	0.001768	36	19
Thyroid hormone signaling pathway	0.001768	58	20
Insulin signaling pathway	0.00222418	71	19
Neurotrophin signaling pathway	0.00285574	61	21
Prostate cancer	0.0036847	49	18
Axon guidance	0.00383658	59	19
FoxO signaling pathway	0.00440323	66	18
PI3K-Akt signaling pathway	0.00455387	149	20
T cell receptor signaling pathway	0.00455736	54	19
N-Glycan biosynthesis	0.0048509	23	14
mTOR signaling pathway	0.0049138	34	15
Glutamatergic synapse	0.0049138	56	19
Acute myeloid leukemia	0.00691343	31	18
Melanoma	0.00791275	39	18
Pathways in cancer	0.0086065	174	20
Regulation of actin cytoskeleton	0.0100553	100	20
Choline metabolism in cancer	0.0116142	51	18
Long-term potentiation	0.0116142	36	19
cAMP signaling pathway	0.016604	90	20
Hepatitis B	0.018938	65	19
Oxytocin signaling pathway	0.0198098	73	19
Type II diabetes mellitus	0.0200171	26	17
p53 signaling pathway	0.0203063	34	14
Dorso-ventral axis formation	0.0203063	17	16
Chronic myeloid leukemia	0.0203063	38	19
Adrenergic signaling in cardiomyocytes	0.0203063	65	20
B cell receptor signaling pathway	0.0267514	36	19
AMPK signaling pathway	0.0332192	57	17
Pancreatic cancer	0.0332192	32	18
Estrogen signaling pathway	0.0335791	46	19
Sphingolipid signaling pathway	0.0355745	55	18
Ubiquitin mediated proteolysis	0.0382212	64	19
Non-small cell lung cancer	0.0427646	29	17
Fc gamma R-mediated phagocytosis	0.0463869	44	16
Platelet activation	0.0476069	57	19
Colorectal cancer	0.0478062	31	19
cGMP-PKG signaling pathway	0.0489977	73	20

## Sheet: ADdowncluster3
Supplementary Table S4c. KEGG results of cluster 3.
KEGG pathway	p-value	#genes	#miRNAs
ECM-receptor interaction	3.32373e-12	45	17
Thyroid hormone synthesis	0.000130858	40	17
Thyroid hormone signaling pathway	0.000130858	63	18
Arrhythmogenic right ventricular cardiomyopathy (ARVC)	0.000130858	45	18
Axon guidance	0.000166659	64	17
Proteoglycans in cancer	0.000184874	99	19
MAPK signaling pathway	0.000184874	130	20
Oxytocin signaling pathway	0.00025928	82	18
Glutamatergic synapse	0.000267705	59	18
Adrenergic signaling in cardiomyocytes	0.00040753	76	19
Dilated cardiomyopathy	0.00040753	53	19
Pathways in cancer	0.000600055	187	20
Platelet activation	0.00073139	71	19
Morphine addiction	0.00073139	46	20
Retrograde endocannabinoid signaling	0.000949197	53	18
Neurotrophin signaling pathway	0.00111574	65	19
Gap junction	0.00116177	45	16
GABAergic synapse	0.00116177	48	18
Estrogen signaling pathway	0.00129066	50	19
Rap1 signaling pathway	0.00150865	101	18
Focal adhesion	0.00150865	103	19
Phosphatidylinositol signaling system	0.00157328	42	18
Regulation of actin cytoskeleton	0.00157328	105	19
Chronic myeloid leukemia	0.00236826	40	18
Glycosaminoglycan biosynthesis - chondroitin sulfate / dermatan sulfate	0.00247296	10	9
Ras signaling pathway	0.00247296	104	19
Prolactin signaling pathway	0.00247296	37	19
Adherens junction	0.00290133	39	15
FoxO signaling pathway	0.00290133	69	19
Renal cell carcinoma	0.00352549	38	18
Melanoma	0.0047538	38	18
Melanogenesis	0.0056884	52	17
PI3K-Akt signaling pathway	0.0056884	157	19
Amoebiasis	0.00688082	48	19
TGF-beta signaling pathway	0.00701666	39	18
Glioma	0.00701666	33	18
Pancreatic cancer	0.00705385	36	18
Prostate cancer	0.00710918	47	19
mTOR signaling pathway	0.0092763	35	18
Hippo signaling pathway	0.0103457	75	17
Gastric acid secretion	0.0110171	41	17
Hypertrophic cardiomyopathy (HCM)	0.0110171	44	18
Tight junction	0.0137947	67	17
AMPK signaling pathway	0.0155065	61	19
Endocytosis	0.0165031	94	18
Mucin type O-Glycan biosynthesis	0.0192481	13	9
Small cell lung cancer	0.0193147	44	17
Wnt signaling pathway	0.0201612	69	18
Long-term potentiation	0.0201612	36	18
Circadian entrainment	0.0202998	51	19
cGMP-PKG signaling pathway	0.021552	78	19
Bacterial invasion of epithelial cells	0.0238336	38	17
Cholinergic synapse	0.0242157	56	19
Type II diabetes mellitus	0.03098	27	18
cAMP signaling pathway	0.0316602	92	20
p53 signaling pathway	0.0376782	36	18
Sphingolipid signaling pathway	0.0381984	57	17
Endometrial cancer	0.0381984	26	18
GnRH signaling pathway	0.0402497	45	17
T cell receptor signaling pathway	0.0402497	51	18
Insulin secretion	0.0429269	43	19
Thyroid cancer	0.0449405	16	13
Long-term depression	0.0480804	33	17

## Sheet: PDupcluster4
Supplementary Table S4d. KEGG results of cluster 4.
KEGG pathway	p-value	#genes	#miRNAs
Fatty acid biosynthesis	2.22939e-13	5	3
Hippo signaling pathway	4.85094e-11	68	12
Proteoglycans in cancer	3.68278e-08	85	12
Signaling pathways regulating pluripotency of stem cells	1.32778e-06	65	12
Renal cell carcinoma	3.45076e-06	37	12
ECM-receptor interaction	5.69431e-06	36	11
Pathways in cancer	5.7778e-06	149	13
PI3K-Akt signaling pathway	8.81197e-06	136	12
Wnt signaling pathway	1.64849e-05	64	12
Thyroid hormone signaling pathway	1.84877e-05	50	12
TGF-beta signaling pathway	1.93136e-05	39	11
Focal adhesion	1.93136e-05	90	12
Glioma	0.000142878	30	11
Endometrial cancer	0.000225119	27	10
Prostate cancer	0.000225119	43	12
ErbB signaling pathway	0.000276996	41	12
Melanoma	0.000276996	35	12
Colorectal cancer	0.000399071	30	11
Mucin type O-Glycan biosynthesis	0.000469842	11	6
Thyroid cancer	0.000564689	16	10
Chronic myeloid leukemia	0.000925543	34	11
Non-small cell lung cancer	0.00202276	26	11
FoxO signaling pathway	0.00210968	57	12
Lysine degradation	0.00264092	19	11
Glycosaminoglycan biosynthesis - heparan sulfate / heparin	0.004256	9	6
mTOR signaling pathway	0.004256	30	9
Transcriptional misregulation in cancer	0.004256	68	12
p53 signaling pathway	0.00588603	31	9
Axon guidance	0.00698348	48	11
Ras signaling pathway	0.00698348	82	12
MAPK signaling pathway	0.00876599	95	13
Nicotine addiction	0.0117753	17	11
Pancreatic cancer	0.0128918	29	11
Bacterial invasion of epithelial cells	0.0140922	33	11
Long-term depression	0.0142578	26	11
Hypertrophic cardiomyopathy (HCM)	0.0156949	35	11
Regulation of actin cytoskeleton	0.0183522	80	12
Basal cell carcinoma	0.0197155	25	11
Ubiquitin mediated proteolysis	0.0197155	50	12
Viral carcinogenesis	0.0197155	60	12
Neurotrophin signaling pathway	0.023464	49	12
Circadian rhythm	0.0275025	17	9
Cell cycle	0.0278301	47	11
Hedgehog signaling pathway	0.0287236	23	11
Dilated cardiomyopathy	0.031583	36	11
Prolactin signaling pathway	0.0372177	27	10
T cell receptor signaling pathway	0.0372177	41	11
Dorso-ventral axis formation	0.0386279	14	10
Acute myeloid leukemia	0.0386279	24	12
Central carbon metabolism in cancer	0.0498058	26	11
Choline metabolism in cancer	0.0498058	39	11

## Sheet: PDdowncluster6
Supplementary Table S4e. KEGG results of cluster 6.
KEGG pathway	p-value	#genes	#miRNAs
Fatty acid biosynthesis	1.33907e-12	6	3
N-Glycan biosynthesis	7.85181e-06	24	11
Arrhythmogenic right ventricular cardiomyopathy (ARVC)	5.45328e-05	41	11
AMPK signaling pathway	7.66301e-05	61	13
Prostate cancer	0.000118947	48	14
Axon guidance	0.000143377	58	13
ErbB signaling pathway	0.000168962	47	14
Signaling pathways regulating pluripotency of stem cells	0.000168962	65	15
Proteoglycans in cancer	0.000253242	88	15
Thyroid hormone signaling pathway	0.000260206	53	14
Hippo signaling pathway	0.000373154	64	13
Regulation of actin cytoskeleton	0.000373154	96	15
Adherens junction	0.000403076	38	12
Glioma	0.000416861	32	13
mTOR signaling pathway	0.000431119	34	13
FoxO signaling pathway	0.000787436	61	13
PI3K-Akt signaling pathway	0.000787436	137	15
Biotin metabolism	0.000899042	2	2
Long-term depression	0.000899042	31	13
Focal adhesion	0.00110036	90	15
Acute myeloid leukemia	0.0013761	30	13
TGF-beta signaling pathway	0.00146461	30	12
Long-term potentiation	0.00234583	35	13
Renal cell carcinoma	0.00234583	35	14
cGMP-PKG signaling pathway	0.00288147	72	14
Pathways in cancer	0.00376607	155	16
Sphingolipid signaling pathway	0.00410066	52	13
Oxytocin signaling pathway	0.00529229	68	14
MAPK signaling pathway	0.006318	101	15
Glutamatergic synapse	0.00651758	51	14
ECM-receptor interaction	0.00719065	35	12
Endometrial cancer	0.00719065	28	13
Ubiquitin mediated proteolysis	0.00719065	62	14
Hypertrophic cardiomyopathy (HCM)	0.00789619	40	11
Melanoma	0.00847043	35	13
Neurotrophin signaling pathway	0.00999098	54	14
Ras signaling pathway	0.0127346	87	15
Wnt signaling pathway	0.0157655	59	13
Thyroid hormone synthesis	0.0162573	26	14
Choline metabolism in cancer	0.0162573	47	14
Lysine degradation	0.0184593	19	12
Non-small cell lung cancer	0.0189191	26	13
Gap junction	0.0192723	36	13
Calcium signaling pathway	0.0198367	73	14
Endocytosis	0.0233897	81	13
Phosphatidylinositol signaling system	0.02441	34	13
Pancreatic cancer	0.0319221	29	13
Dilated cardiomyopathy	0.0327243	40	12
Dorso-ventral axis formation	0.0346859	15	11
Chronic myeloid leukemia	0.0346859	32	14
Rap1 signaling pathway	0.0346859	80	15
Adrenergic signaling in cardiomyocytes	0.0404198	59	14
