# Supplementary material for: Differential Expression of Plasma Exo-miRNA in Neurodegenerative Diseases by Next-Generation Sequencing
Source: Front Neurosci. 2020 May 7;14:438. doi: 10.3389/fnins.2020.00438 (PMC7227778; doi:10.3389/fnins.2020.00438)
Supplement: TABLE S6 — Expression of 8 miRNAs in AD and PD samples. [file Table_6.XLSX]

## Sheet: Sheet1
Supplementary Table S6. Expression of 8 miRNAs in AD and PD samples.
miRNA id	AD	PD	log2FoldChange(PD/AD)	Pvalue	Up/Down-Regulation	Previous Study
miR-320e	0.682076	74.7229	6.77547	8.24841e-07	Up	New
miR-548k	1.03968	49.8006	5.58196	0.000268027	Up	Plasma exosome
miR-548ap-3p	0.57909	37.042	5.99923	0.000468987	Up	Plasma exosome
let-7e-5p	496.074	3504.88	2.82074	0.000887887	Up	Whole blood
miR-423-5p	12071.5	796.718	-3.92139	0.00352489	Down	New
miR-378d	287.869	9.02528	-4.99529	0.00423683	Down	New
miR-193b-5p	16.0524	235.228	3.8732	0.00828259	Up	Serum plasma
miR-548ad-5p	0.741985	24.1013	5.02158	0.00692392	Up	Plasma exosome
